# Supplementary material
Source: publisher figshare collection journal article supplement (https://asha.figshare.com/articles/dataset/_/6170351)
Supplement: Supplementary file 1 [file 1]

**Supplementary Table C.** Sensitivity and specificity values (and 95% confidence intervals) for measures from each study.

| Study                                     | Measure                                  | Sensitivity          | Specificity          |
|-------------------------------------------|------------------------------------------|----------------------|----------------------|
| Girbau & Schwartz, 2008                   | Nonword repetition                       | 0.818 (0.482, 0.977) | 0.909 (0.587, 0.998) |
| Gutiérrez-Clellen & DeCurtis, 1999        | Formal word definition                   | 0.500 (0.157, 0.843) | 1.000 (0.664, 1.000) |
| Gutiérrez-Clellen et al., 2006            | Spanish Morphosyntax Test–4 <sup>a</sup> | 0.875 (0.473, 0.997) | 1.000 (0.631, 1.000) |
|                                           | Spanish Morphosyntax Test–5 <sup>b</sup> | 1.000 (0.590, 1.000) | 1.000 (0.590, 1.000) |
|                                           | Spanish Morphosyntax Test–6 <sup>c</sup> | 0.429 (0.099, 0.816) | 1.000 (0.590, 1.000) |
| Gutiérrez-Clellen & Simon-Cereijido, 2007 | English Morphosyntax Test                | 0.800 (0.444, 0.975) | 0.900 (0.555, 0.997) |
| Gutiérrez-Clellen et al., 2008            | Finite verb marking                      | 0.909 (0.587, 0.998) | 0.625 (0.354, 0.848) |
|                                           | Obligatory subject                       | 0.091 (0.002, 0.413) | 1.000 (0.794, 1.000) |
| Jacobson & Schwartz, 2005                 | Past tense, regular verb                 | 0.917 (0.615, 0.998) | 0.867 (0.595, 0.983) |
|                                           | Past tense, irregular verb               | 0.917 (0.615, 0.998) | 0.733 (0.449, 0.922) |
|                                           | Past tense, nonsense verb                | 1.000 (0.735, 1.000) | 0.733 (0.449, 0.922) |
| Restrepo, 1998                            | PRSLP+NETU <sup>d</sup>                  | 0.875 (0.473, 0.997) | 1.000 (0.631, 1.000) |
|                                           | PRSLP+NETU+MLTU+FHSLP <sup>d</sup>       | 0.875 (0.473, 0.997) | 1.000 (0.631, 1.000) |
| Roseberry & Connell, 1991                 | Invented morpheme                        | 0.769 (0.462, 0.950) | 0.923 (0.640, 0.998) |
| Simon-Cereijido & Gutiérrez-Clellen 2007  | MLU+UNGRAMM <sup>d</sup>                 | 0.800 (0.284, 0.995) | 0.800 (0.284, 0.995) |
|                                           | CLITIC+VERB+ART <sup>d</sup>             | 0.800 (0.284, 0.995) | 0.800 (0.284, 0.995) |
|                                           | MLU+THEME+DITRAN <sup>d</sup>            | 1.000 (0.478, 1.000) | 0.800 (0.284, 0.995) |

*Note.* PRSLP = parent report of speech and language problems; NETU = number of errors per T-unit; MLTU = mean length of T-unit; FHSLP = family history of speech and language problems; MLU = mean length of utterance in words; UNGRAMM = percentage utterances with grammatical errors; CLITIC = clitic errors; VERB = verb errors; ART = article errors; THEME = percentage correct use of theme arguments; DITRAN = percentage of ditransitive verbs.

<sup>a,b,c</sup> Spanish Morphosyntax Test in children aged 4;0–5;1, 5;2–5;11, and 6;1–7;0, respectively. <sup>d</sup>Measure derived from discriminant function analyses.
