# Supplementary material
Source: publisher figshare collection journal article supplement (https://asha.figshare.com/articles/dataset/_/6170351)
Supplement: Supplementary file 2 [file 1]

**Supplementary Table A.** Contingency table for calculating diagnostic accuracy metrics.

---

| Reference standard result (“true” status) |                    |                    |
|-------------------------------------------|--------------------|--------------------|
| Index test result                         | Affected           | Unaffected         |
| Affected                                  | True positive (a)  | False positive (b) |
| Unaffected                                | False negative (c) | True negative (d)  |

---

*Note.* Base rate (proportion of affected individuals in sample) =  $[(a+c)/(a+b+c+d)]$ .
