# Supplementary material
Source: publisher figshare collection journal article supplement (https://asha.figshare.com/articles/dataset/_/6170351)
Supplement: Supplementary file 3 [file 1]

**Supplementary Table B.** Diagnostic accuracy metrics.

| Metric and formula                    | Definition                                                                                                                    |
|---------------------------------------|-------------------------------------------------------------------------------------------------------------------------------|
| Sensitivity $[a/(a+c)]$               | Of those with the condition according to the reference standard, the proportion identified as affected by the index test      |
| Specificity $[d/(b+d)]$               | Of those free of the condition according to the reference standard, the proportion identified as unaffected by the index test |
| Positive predictive value $[a/(a+b)]$ | Of those identified as affected by the index test, the proportion with the condition according to the reference standard      |
| Negative predictive value $[d/(c+d)]$ | Of those identified as unaffected by the index test, the proportion free of the condition according to the reference standard |
| LR+ $[sensitivity/(1-specificity)]$   | Likelihood of a positive (affected) index test score in someone with the condition versus in someone free of the condition    |
| LR- $[(1-sensitivity)/specificity]$   | Likelihood of a negative (unaffected) index test score in someone free of the condition versus in someone with the condition  |

*Note.* LR+ = positive likelihood ratio; LR– = negative likelihood ratio.
